# Supplementary material for: Bioleaching of sludge from acid-leached waste traction batteries used in electric vehicles for the extraction of Ni and Co using optimized microbial consortia
Source: Royal Society of Chemistry journal article supplement (doi:10.1039/d5ra07472j), 2025-01-01
Supplement: d5ra07472j1.pdf [file d5ra07472j1.pdf]

Biorecovery of sludge from acid-leached traction battery used in electric vehicle for the extraction of Ni and Co using adapted microbial consortiums

Haifei Lu, Xiaofei Yan, Xiang Chen, Lili Wang, Houhu Zhang\*

Nanjing Institute of Environmental Sciences, Ministry of Ecology and Environment of the People's Republic of China, Nanjing 210042, China

Corresponding author. E-mail address: yxf19881010@163.com

Table S1. Concentrations of Ni in Ni slag (a) and Co in Co slag (b) measured by a handheld X-ray fluorescence spectrum.

| Element | Concentration (PPM) |                 |
|---------|---------------------|-----------------|
|         | Ni                  | Co              |
| Fe      | $98810 \pm 245$     | $56044 \pm 171$ |
| Ca      | $68791 \pm 266$     | $2604 \pm 62$   |
| Ba      | $11443 \pm 54$      | $11056 \pm 44$  |
| Ni      | $7209 \pm 56$       | $973 \pm 20$    |
| Cr      | $4280 \pm 34$       | ---             |
| Cu      | $3133 \pm 33$       | $1737 \pm 22$   |
| Mn      | $1835 \pm 58$       | ---             |
| W       | $1421 \pm 33$       | ---             |
| K       | ---                 | $6762 \pm 141$  |
| Co      | ---                 | $4093 \pm 40$   |
| Ti      | ---                 | $3691 \pm 47$   |
